# Supplementary material
Source: publisher site journal article supplement (https://www.dovepress.com/article/supplementary_file/600218/600218_Revised%20Supplementary%20Material_1.docx)
Supplement: Supplementary file 1 [file 600218_Revised%20Supplementary%20Material_1.docx]

# **Supplementary Table**

**Supplementary Table S1** Baseline clinical characteristics of patients with stable and exacerbation-stage COPD. Data were presented as mean±SD, median, or n (%).

|  | Stable (n=17) | AECOPD (n=30) | FE (n=16) | IE (n=14) |
| --- | --- | --- | --- | --- |
| Age, yr, mean±SD | 70.29±6.98 | 75.4±9.32 | 75.69±8.14 | 75.07±10.82 |
| Sex, Male,n(%) | 17(100%) | 25(83.33%) | 14(87.50%） | 10(71.43%） |
| Smoking Index, M | 600 | 600 | 700 | 425 |
| BMI, M | 24.89 | 22.22 | 21.74 | 22.57 |
| CAT Score, M | 19 | 24 | 22.5 | 28.5 |
| mMRC Questionnaire, M | 2 | 3 | 3 | 3 |
| FEV1/FVC (%) | 59.74±9.14 | 55.14±15.07 | 53.55±15.79 | 57.26±14.44 |
| FEV1(% pred), M | 59.7 | 32.6 | 29.65 | 34.45 |
| 6minWalkingDistance, M | 275 | 205 | 210 | 195 |
| White Blood Cell, (x10^9,mean±SD) | 6.18±1.26 | 8.47±3.89 | 7.67±2.85 | 9.38±4.76 |
| N, mean±SD | 3.73±0.95 | 6.43±3.39 | 5.75±2.53 | 7.2±4.13 |
| N%, (%, mean±SD) | 63.85±5.25 | 74.47±10.08 | 73.57±10.82 | 75.49±9.45 |
| L%, mean±SD | 22.51±4.2 | 15.47±7.58 | 16.66±7.99 | 14.11±7.13 |
| L, mean±SD | 1.4±0.42 | 1.2±0.56 | 1.2±0.58 | 1.2±0.56 |
| Hb, mean±SD | 138.18±11.06 | 129.5±16.19 | 125±15.71 | 134.64±15.72 |
| IL-6, mean±SD | 4.54±3.09 | 6.57±5.85 | 7.66±6.45 | 5.32±5.01 |
| IL-8, mean±SD | 2.55±1.06 | 5.03±5.09 | 3.71±4.6 | 6.54±5.37 |
| TNF-a, mean±SD | 1.15±0.89 | 1.94±2.06 | 2.55±2.61 | 1.24±0.79 |
| PCT, mean±SD | 0.05±0.05 | 0.11±0.11 | 0.12±0.13 | 0.1±0.09 |
| CRP, mean±SD | 6.48±3.61 | 30.89±40.83 | 26.05±20.37 | 35.74±54.94 |
| CD3, mean±SD | 68.34±9.19 | 47.12±14.88 | 49.6±17.94 | 44.07±9.82 |
| CD4, mean±SD | 36.91±5.53 | 27.39±8.14 | 27.96±9.81 | 26.69±5.79 |
| CD8, mean±SD | 28.31±4.51 | 31.98±9.33 | 35.99±8.75 | 27.05±7.74 |
| CD4/CD8, mean±SD | 1.32±0.13 | 0.89±0.25 | 0.78±0.24 | 1.02±0.19 |
| PH, mean±SD | 7.4±0.03 | 7.41±0.05 | 7.39±0.04 | 7.42±0.05 |
| PaCO2, mean±SD | 5.65±0.36 | 6.71±1.86 | 7.44±2.16 | 5.88±0.98 |
| PaO2, mean±SD | 11.04±0.64 | 13.82±4.88 | 14.72±4.41 | 12.79±5.34 |
| SPO2, mean±SD | 97.29±1.97 | 96.31±4.64 | 97.53±1.64 | 94.92±6.4 |
| Total Protein, mean±SD | 71.41±2.15 | 62.9±8.07 | 60.69±6.65 | 65.44±9.02 |
| albumin, mean±SD | 41±1.8 | 35.72±5.21 | 34.56±4.56 | 37.05±5.74 |
| prealbumin, mean±SD | 309.41±87.38 | 189.77±97.16 | 172.88±84.04 | 209.08±110.26 |
| D-dimer, mean±SD | 0.27±0.1 | 0.73±0.43 | 0.86±0.52 | 0.59±0.24 |

# **Supplementary Figures**


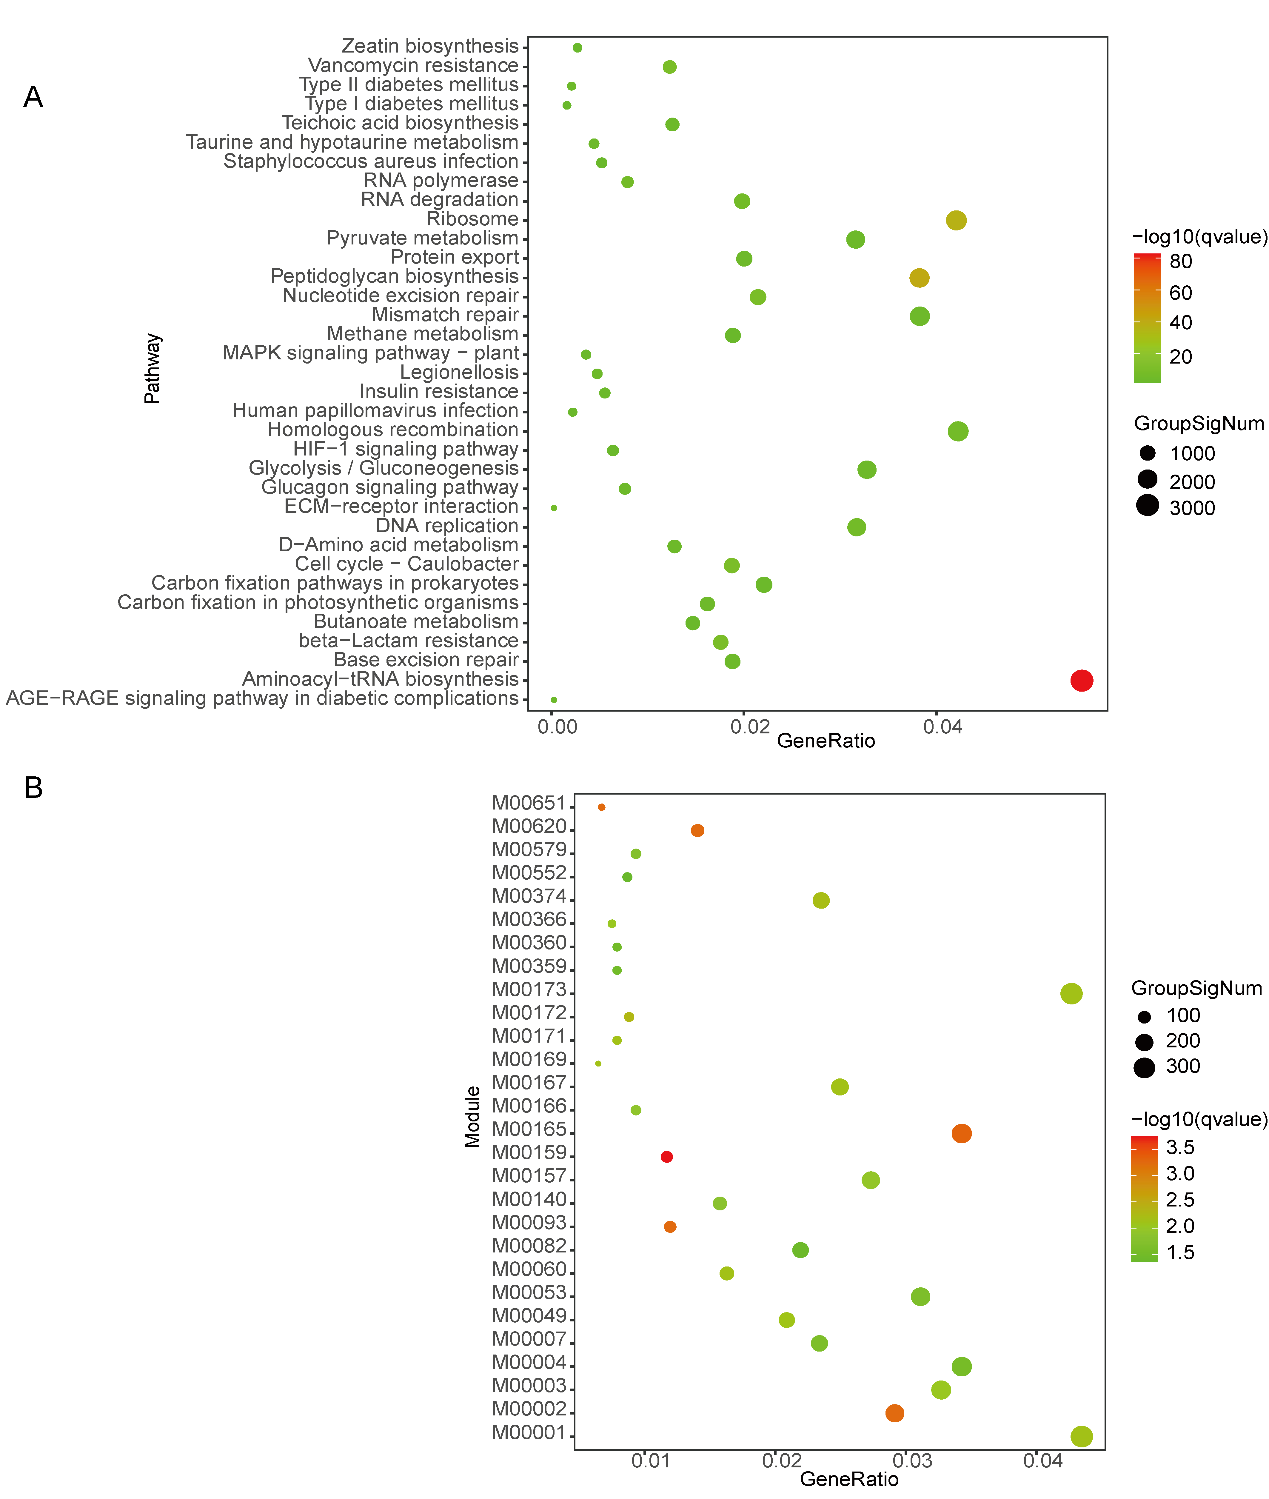


Supplementary Figure S1 Enrichment analysis of significant KEGG functional features. (A) Bubble plot displaying the most significantly enriched level-3 pathways. Bubble size represents the feature numbers, and color intensity reflects statistical significance. (B) Bubble plot displaying the most significantly enriched module. Bubble size represents the feature numbers, and color intensity reflects statistical significance.


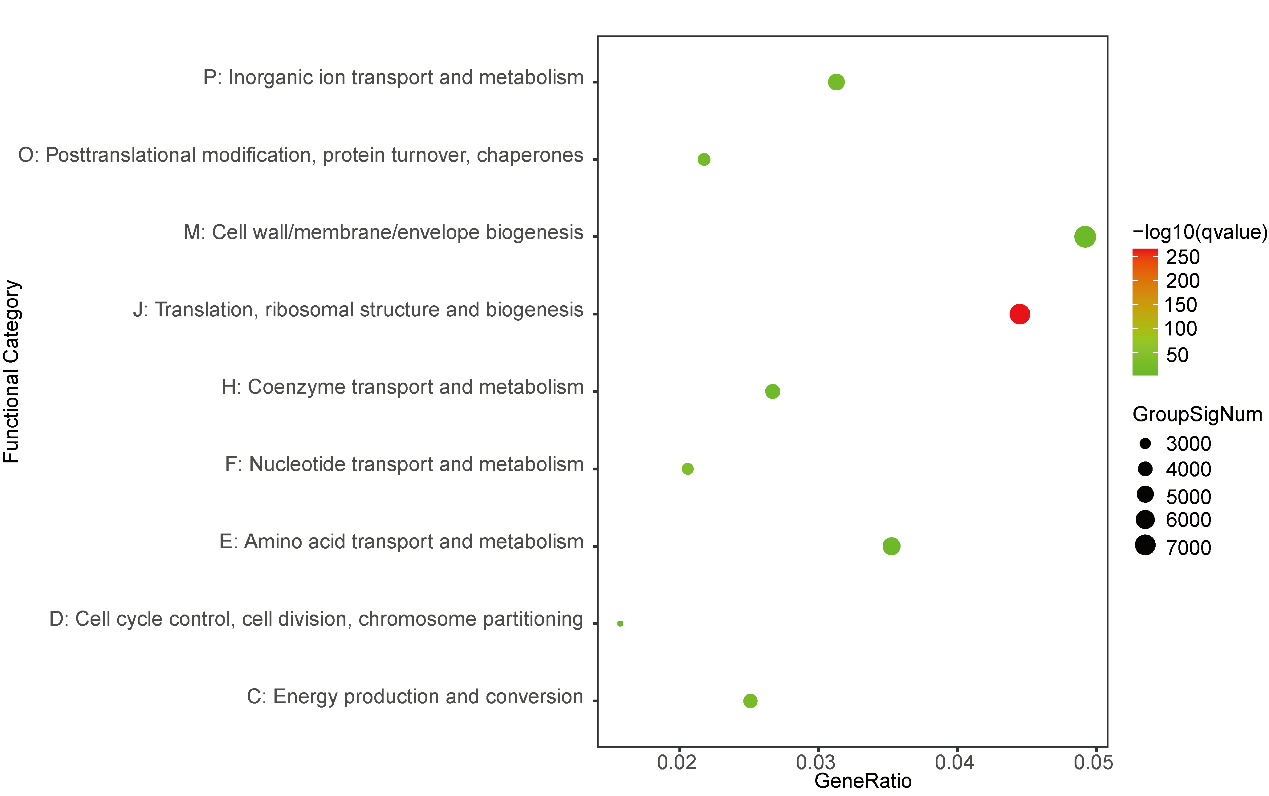


Supplementary Figure S2 Enrichment analysis of significant eggNOG level-1 pathways. Bubble size represents the feature numbers, and color intensity reflects statistical significance.
